# Supplementary material
Source: Elsevier journal article supplement (https://www.sciencedirect.com/science/article/pii/S0001731022002563)
Supplement: mmc1 [file S0001731022002563:mmc1.pdf]

# ANEXO 1:

---

## Encuesta inicial

### CUESTIONARIO DERMATOLOGÍA

- 1.- Edad:
- 2.- Sexo: hombre    mujer
- 3.- Nota media del expediente (aproximada):
- 4.- Cual es tu nivel de asistencia a clase en general:
  - <25%
  - 25-50%
  - 50-75%
  - >75%
- 5.- ¿Consideras que la guía docente responde a las expectativas de esta asignatura?
  - Si
  - No
  - No la he leído
- 6.- Según has leído en la guía docente, ¿ crees que es necesario acudir a todas las clases de dermatología?
  - Si
  - No
  - No la he leído
- 7.- ¿Crees adecuado el proceso de evaluación continua que se propone?
  - Si
  - No
- 8.- ¿ Te parecen apropiadas las herramientas que se van a facilitar para el estudio de la asignatura ( libro de casos clínicos, imágenes, enlaces a recursos webs...)?
  - Si
  - No
- 9.- ¿Consideras que las tutorías pueden ser útiles para el aprendizaje de la asignatura?
  - Si
  - No
- 10.- Tu experiencia previa en seminarios ha sido:
  - Solo asisto porque son obligatorias
  - Participativos
  - Útiles
  - Similares a clases teóricas
  - Prácticos
- 11.- ¿Consideras que las tutorías pueden ser útiles para el aprendizaje de la asignatura?
  - Sí
  - No
- 12.- ¿Te gusta la dermatología como opción profesional?
  - Sí
  - No
- 13.- ¿Qué conoces de esta asignatura?
- 14.- ¿Qué expectativas tienes de esta asignatura?
- 15.- ¿Qué miedos tienes sobre esta asignatura?

16.- En relación a las siguientes afirmaciones marque de 1 a 5 (1 = muy en desacuerdo; 2= en desacuerdo, 3= neutral; 4= de acuerdo; 5= muy de acuerdo)

Las enfermedades de la piel:

Son un motivo frecuente de consulta: 12345

Difícilmente controlables: 12345

La mayoría son incurables: 12345

Normalmente nos indican solo patología cutánea: 12345

Son muy contagiosas :12345

La mayoría pican y escuecen: 12345

Implican gran afectación psíquica 1234 5

El diagnóstico clínico es complejo: 12345

Salvo el cáncer cutáneo la mayoría son banales: 12345

Gran parte de la patología puede ser tratada y diagnosticada por médicos no especialistas: 12345

Gran parte de la patología puede ser tratada y diagnosticada por profesiones afines no médicas: 12345

Los estilos de vida pueden influir en las enfermedades cutáneas: 12345

Me resultaría desagradable su exploración: 12345

Los dermatólogos:

Tienen una gran consideración entre los médicos de otras especialidades: 12345

Tiene gran reconocimiento social (población general/pacientes): 12345

Tienen un mayor grado de responsabilidad comparado con otros especialistas: 12345

Tienen un trabajo más variado en relación a otros especialistas: 12345

Tratan fundamentalmente con fármacos tópicos: 12345

Tratan fundamentalmente con cirugía: 12345

Tratan fundamentalmente con cosméticos o físicos (láser..): 12345

Tratan fundamentalmente con fármacos sistémicos: 12345

Son innovadores: 12345

17.-¿Por qué cree que es una de las especialidades más demandadas en el MIR?

18.- ¿Has tenido alguna experiencia personal con la Dermatología? No; Si: Como paciente. Como familiar.

Indica la patología:

19.-Deseas realizar algún comentario o propuesta para el desarrollo de la asignatura

Muchas gracias por tu colaboración
